# Supplementary material for: General fabrication of hollow colloids from polymer self-assembly cavity-forming strategy
Source: Royal Society of Chemistry journal article supplement (doi:10.1039/d3py00501a), 2023-12-19
Supplement: d3py00501a1.pdf [file d3py00501a1.pdf]

## Supporting Information

# General fabrication of hollow colloids from polymer self-assembly cavity-forming strategy

*Weiliang Dong,<sup>1</sup> Lei Tian,<sup>1\*</sup> Xintong Li,<sup>1</sup> Dai Wang,<sup>1</sup> Haiyu Huang,<sup>1</sup> Jiji Tan,<sup>1</sup>*

*Caizhen Zhu,<sup>1</sup> Jian Xu<sup>1</sup>*

<sup>1</sup> Institute of Low-dimensional Materials Genome Initiative, College of Chemistry and  
Environmental Engineering of Shenzhen University, Shenzhen 518060, China

\*Corresponding author:

Email: leitian@szu.edu.cn,

## Results and Discussion

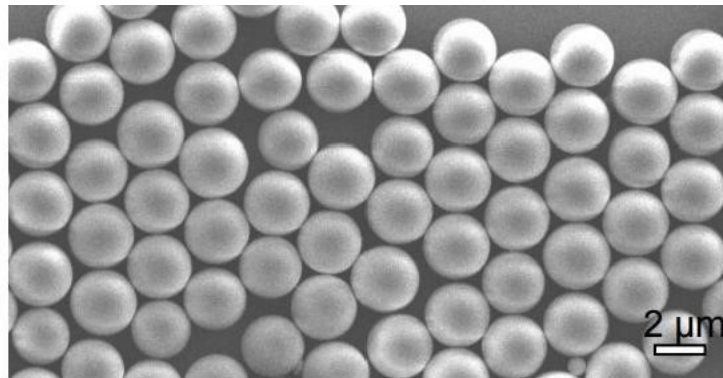

**Figure S1.** SEM image of PGMA microparticles.

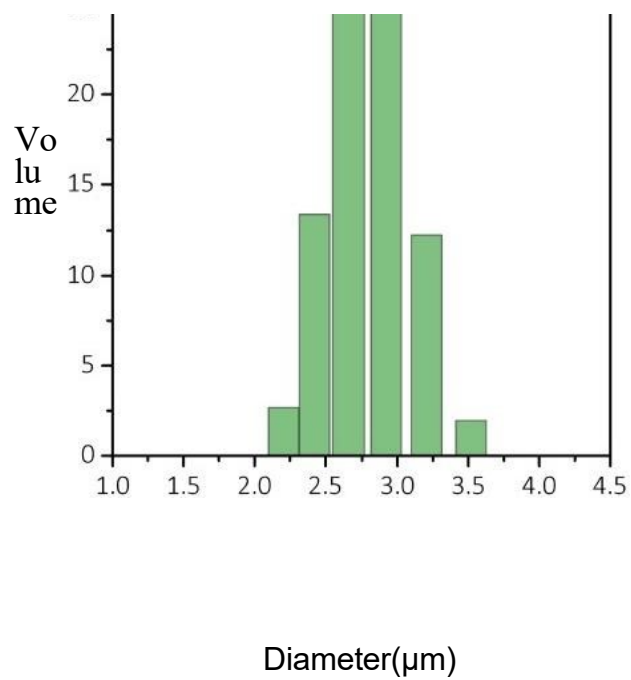

**Figure S2.** Particle size distribution curve of PGMA microparticles.

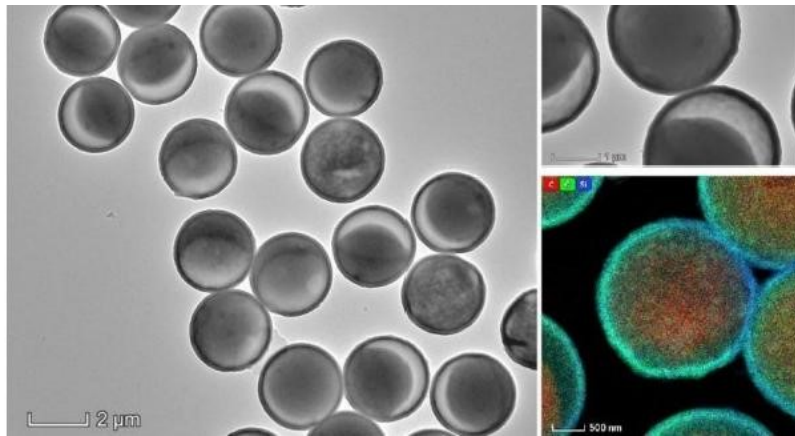

**Figure S3.** TEM and elemental mapping images of hollow microtumblers.

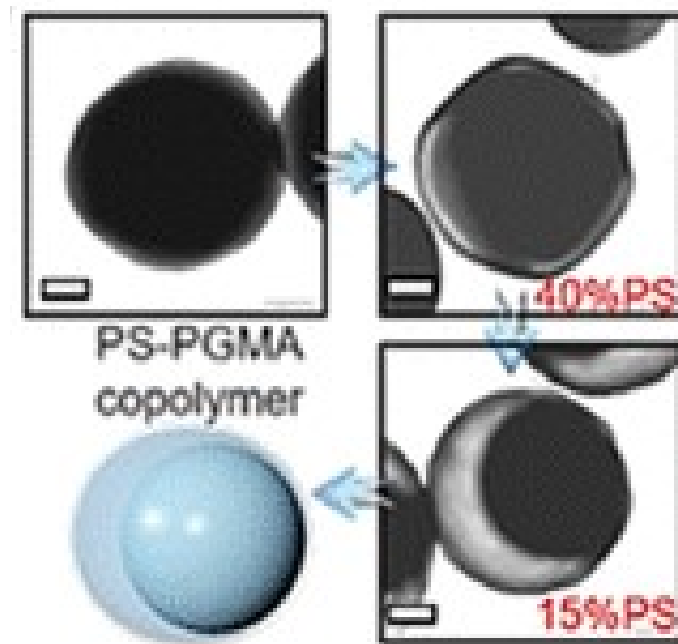

**Figure S4.** Cartoon and TEM images showing control of cavity via co-polymerization with different proportions of St. Scale bar: 500 nm.

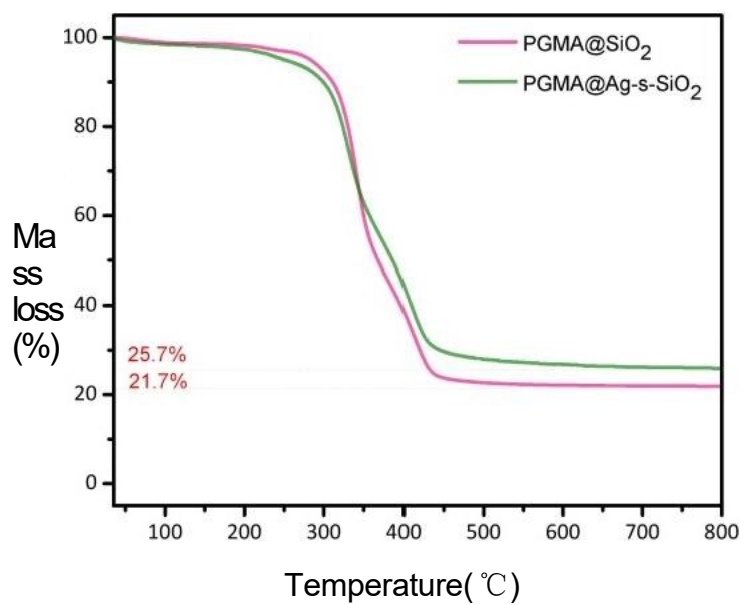

**Figure S5.** TGA curves of PGMA@Ag-s-SiO<sub>2</sub> and s-SiO<sub>2</sub>@Ag hollow colloid.

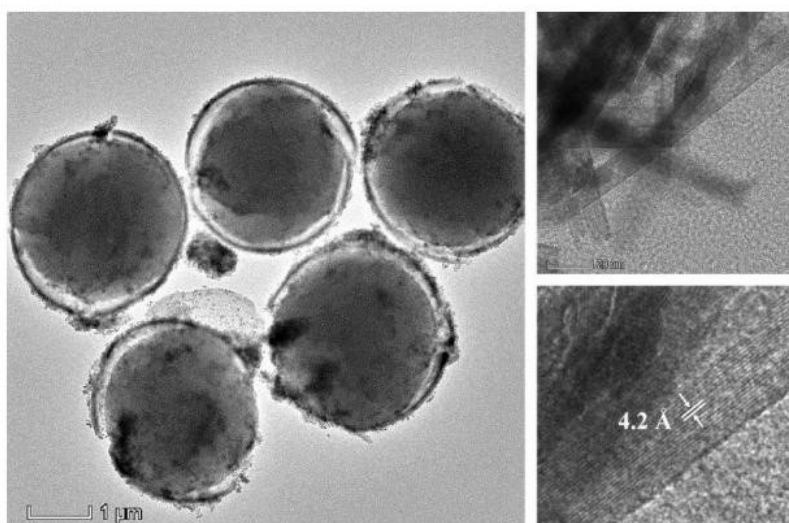

**Figure S6.** TEM images of PGMA@FeOOH-s-SiO<sub>2</sub>.

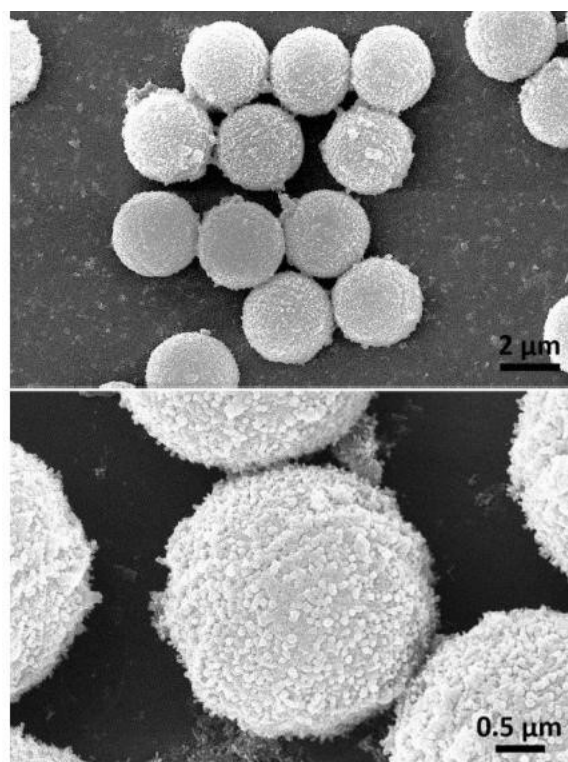

**Figure S7.** SEM images of PGMA@FeOOH-s-SiO<sub>2</sub>.

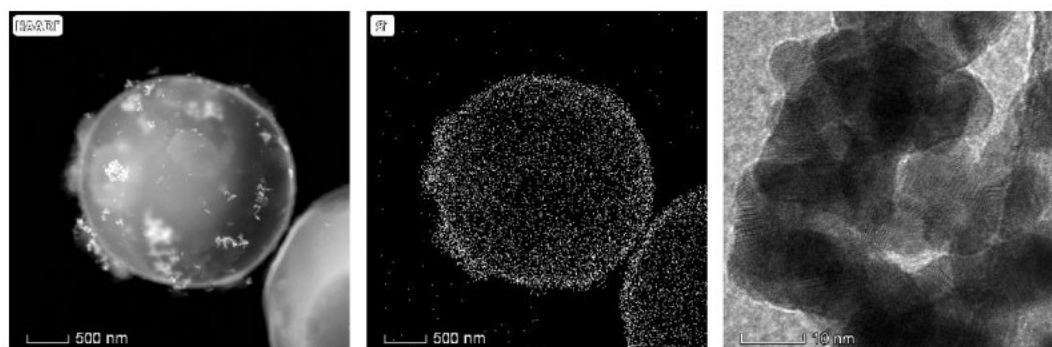

**Figure S8.** TEM and EDX mapping images of Au@s-SiO<sub>2</sub>.

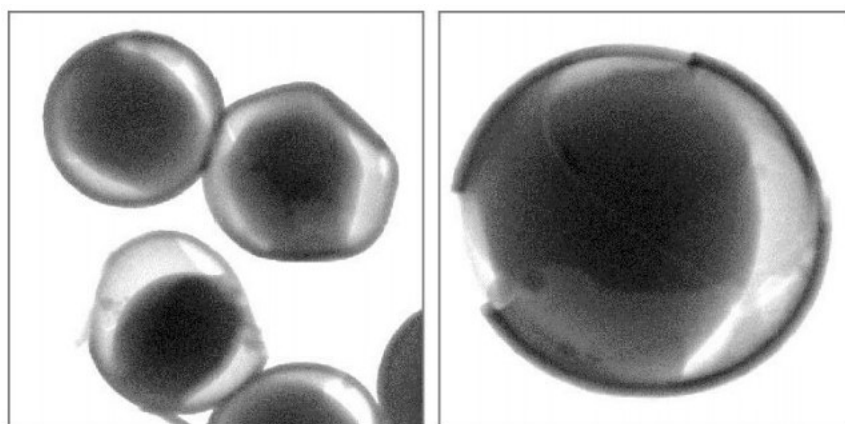

**Figure S9.** TEM images of hollow tumblers swelled by DCM.

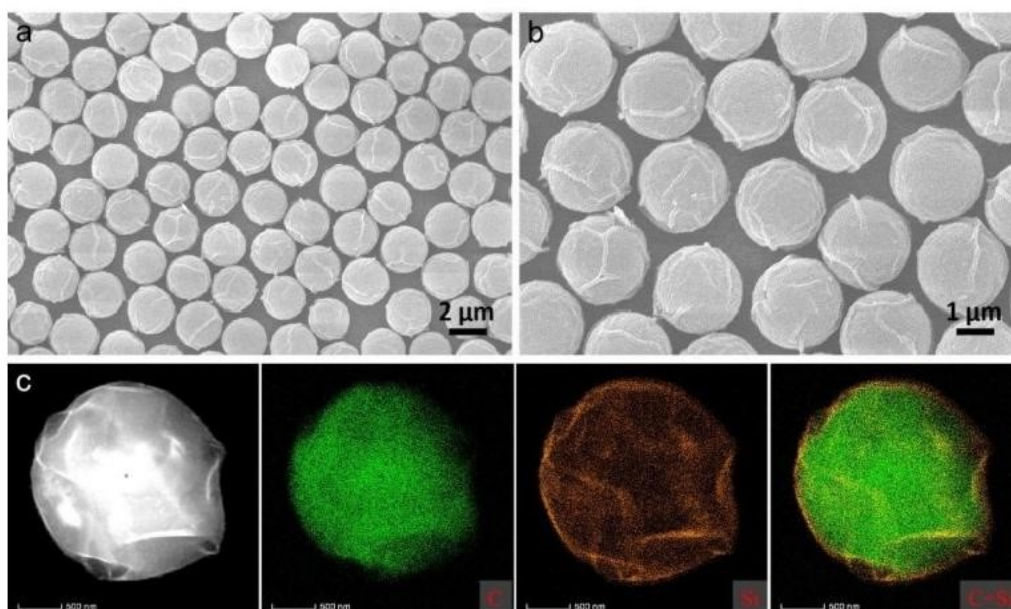

**Figure S10.** SEM images (a,b), and TEM and EDX mapping images(c) of hollow tumblers swelled by THF.
